# Supplementary material for: Downregulation of hepatic ceruloplasmin ameliorates NAFLD via SCO1-AMPK-LKB1 complex
Source: PubMed Central journal article supplement — Cell Rep. Author manuscript; Available in PMC 2023 May 2. (PMC10153649; doi:10.1016/j.celrep.2022.111498), 2022-10-18
Supplement: NIHMS1892046-supplement-1-s2_0-S2211124722013481-mmc1.pdf [file NIHMS1892046-supplement-1-s2_0-S2211124722013481-mmc1.pdf]

**Supplemental information**

**Downregulation of hepatic ceruloplasmin**

**ameliorates NAFLD via SCO1-AMPK-LKB1 complex**

**Liping Xie, Yanmei Yuan, Simiao Xu, Sijia Lu, Jinyang Gu, Yanping Wang, Yibing Wang, Xianjing Zhang, Suzhen Chen, Jian Li, Junxi Lu, Honglin Sun, Ruixiang Hu, Hailong Piao, Wen Wang, Cunchuan Wang, Jing Wang, Na Li, Morris F. White, Liu Han, Weiping Jia, Ji Miao, and Junli Liu**

## Supplemental Information

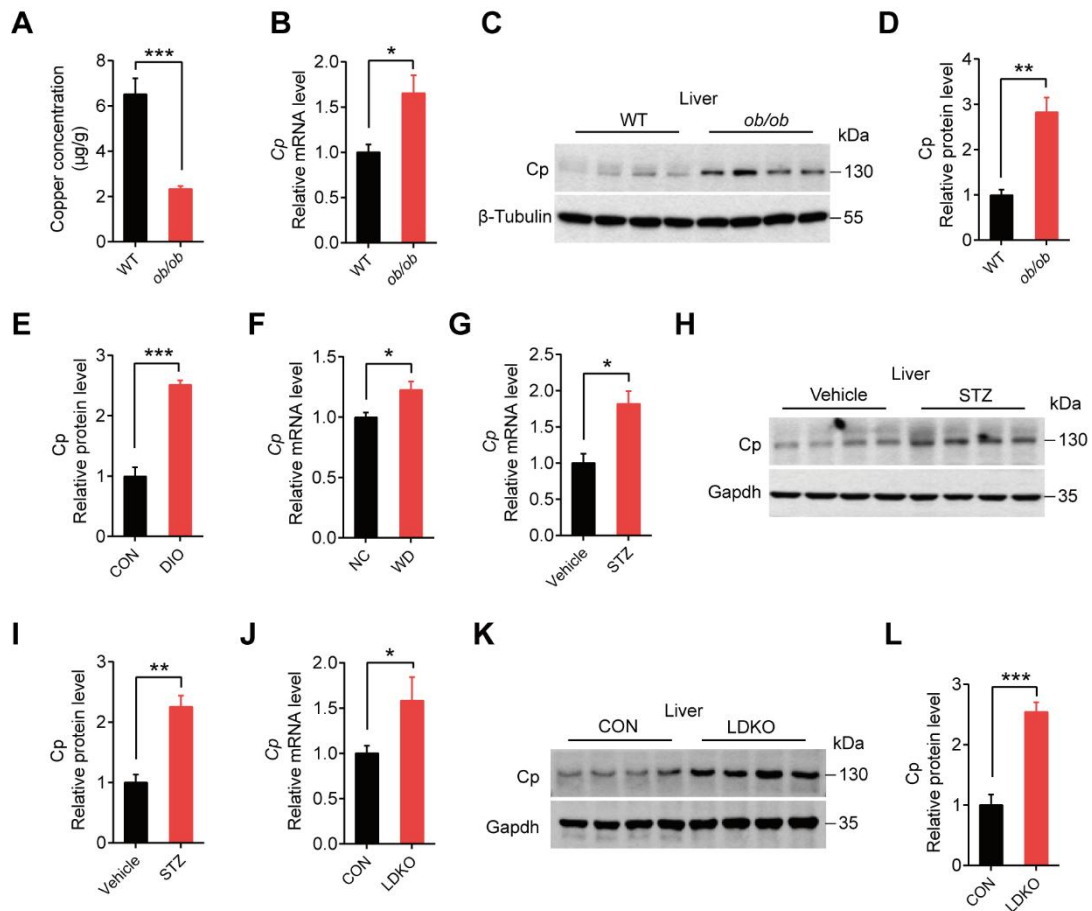

**Figure S1. Hepatic copper concentrations are downregulated and *Cp* expression is upregulated in fatty liver and diabetes, related to Figure 1.**

(A) Hepatic copper concentrations in *ob/ob* and wild-type (WT) mice (n=6 in each group). (B) *Cp* mRNA levels in livers of *ob/ob* and WT mice. (C-D) *Cp* protein levels (C) and their quantified signal intensity (D) in livers of *ob/ob* and WT mice. (E) Quantification of *Cp* protein in Figure 1F. (F) *Cp* mRNA levels in livers of western diet-fed (WD) and normal chow-fed mice (NC). (G) *Cp* mRNA levels in livers of vehicle and STZ-injected mice. (H-I) Immunoblots of *Cp*

protein (H) and their quantification (I) in the livers of vehicle and STZ-injected mice. (J) *Cp* mRNA levels in the livers of LDKO and CON mice. (K-L) Immunoblots of *Cp* protein (K) and their quantification (L) in the livers of LDKO and CON mice.

Data are presented as mean  $\pm$  SEM. \* $p < 0.05$ , \*\* $p < 0.01$ , \*\*\* $p < 0.001$  compared with the control group.

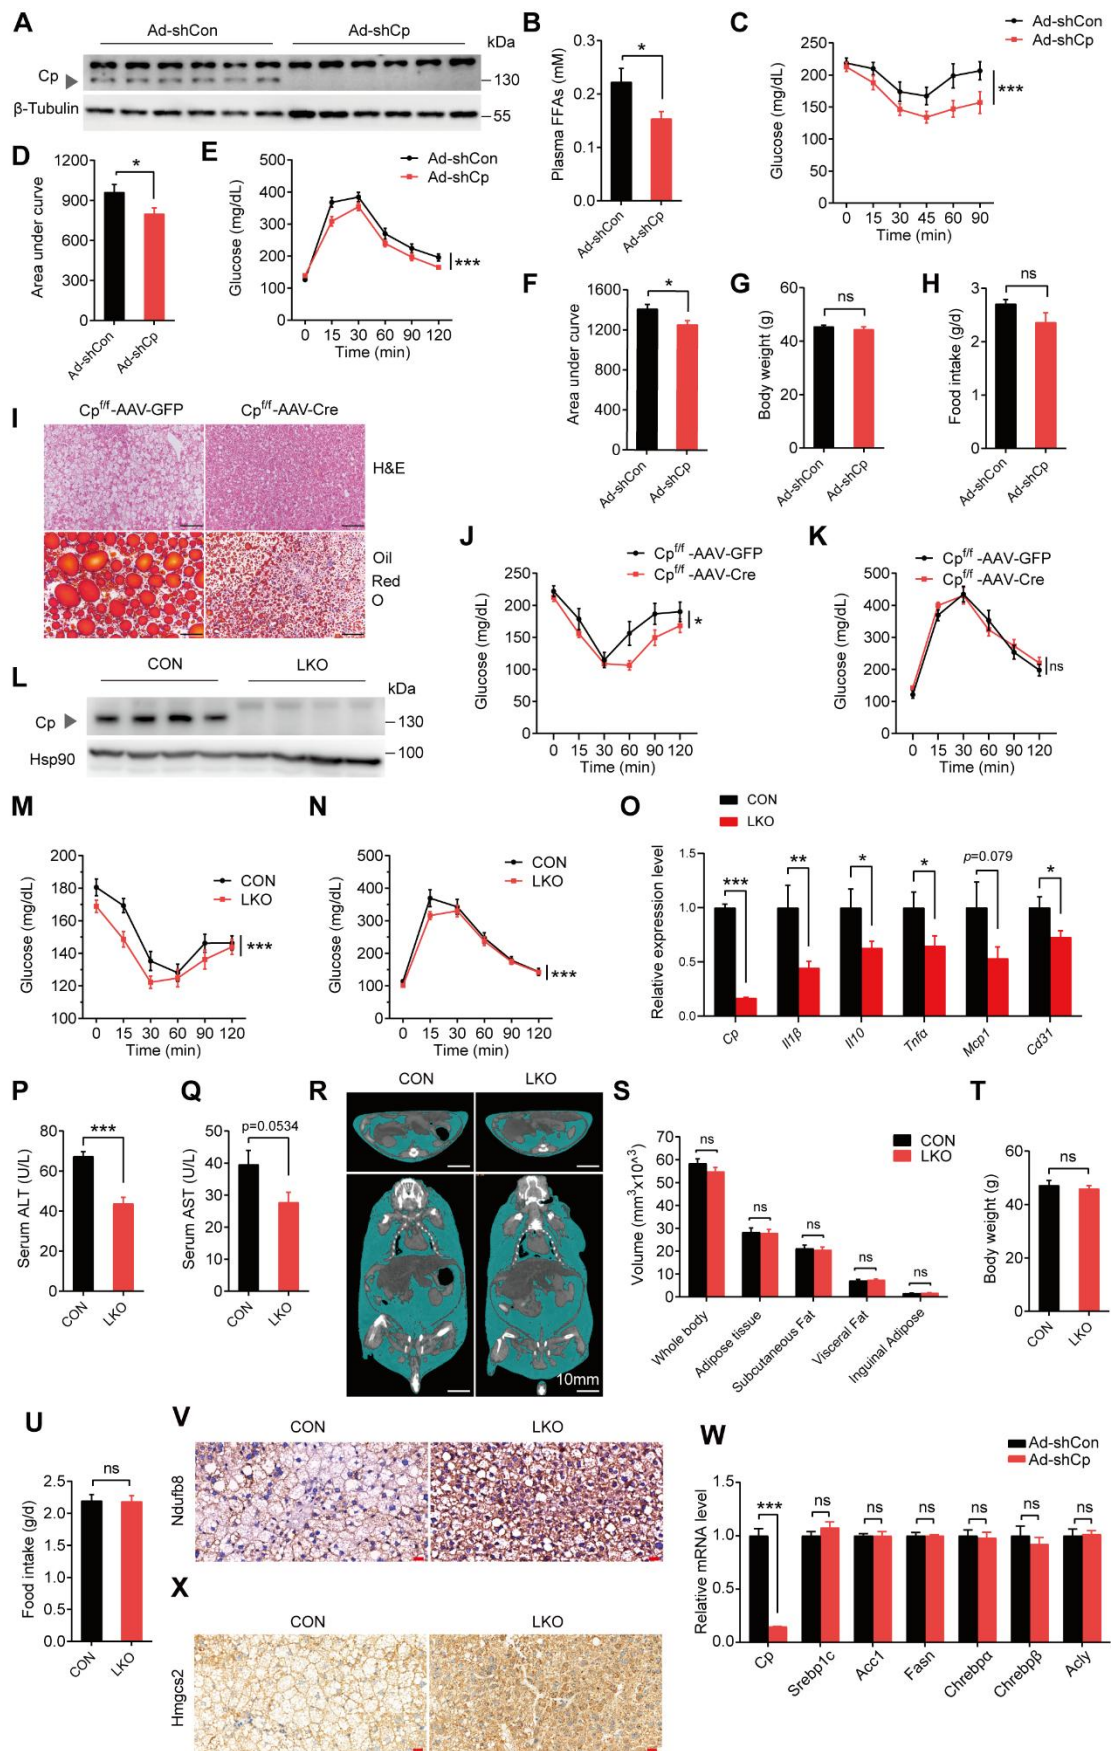

**Figure S2. Cp-knockdown attenuates HFD-induced hepatic**

**steatosis, related to Figure 1 and Figure 2.**

(A-H) DIO mice (fed with a HFD for 13 weeks) were injected with Ad-shCp or Ad-shCon (n=10 in each group). (A) Immunoblots of Cp protein in mouse livers. (B) Free fatty acid (FFA) concentrations in plasma. (C) Insulin tolerance tests (ITT) analysis on day 7 post-injection. (D) Area under curve analysis of ITT in (C). (E) Glucose tolerance tests (GTT) analysis on day 15 post-injection. (F) Area under curve analysis of GTT in (E). (G) Body weight (g) of the mice. (H) Average daily food intake (g/d) of the mice. (I-K) Cp<sup>flox/flox</sup> Mice (fed with a HFD for 8 weeks) were injected with AAV-Cre (Cp<sup>ff</sup>-AAV-GFP) or AAV-GFP (Cp<sup>ff</sup>-AAV-Cre) (n=6 in each group). (I) Representative images of Oil Red O- and H&E-stained liver sections; H&E staining scale bar: 100  $\mu$ m, Oil Red O staining scale bar: 50  $\mu$ m. (J-K) ITT analysis(J) and GTT analysis(K) were performed after HFD feeding for 12 weeks. (L-V) liver-specific Cp knockout (LKO) and control littermates (Cp<sup>ff</sup>, CON) fed with a HFD for 20 weeks. (L) Immunoblot of Cp in mouse liver. (M-N) ITT analysis (M) and GTT analysis (N) after 12 weeks of HFD feeding. (O) mRNA levels of inflammatory factors in the liver of mice. (P-Q) Serum ALT (P) and AST (Q) level of mice. (R-S) The micro-CT analysis of mice (R) and their quantification (S), scale bar: 10 mm. (T) Body weight (g) of the mice. (U) Average daily food intake (g/d)

of the mice. (V) The immunohistochemical staining of Ndufb8 in the liver of mice, scale bar: 20  $\mu$ m. (W) mRNA levels of lipogenic genes in primary hepatocytes treated with Ad-shCon or Ad-shCp. (X) The immunohistochemical staining of Hmgcs2 in the liver of mice, scale bar: 20  $\mu$ m.

Data shown in (O, W) are from one representative experiment of at least three independent experiments. Data are presented as mean  $\pm$  SEM. \* $p$ <0.05, \*\* $p$ <0.01, \*\*\* $p$ <0.001 compared with the control group. ns, not significant.

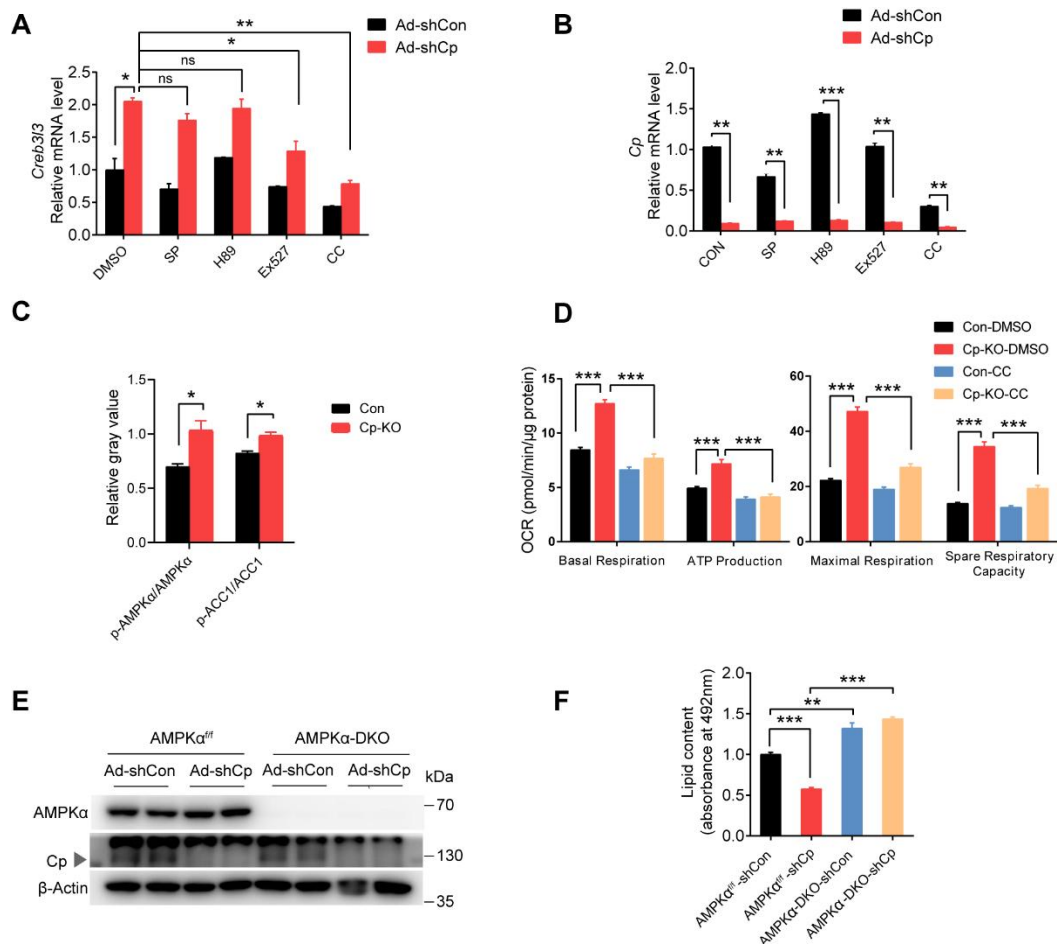

**Figure S3. Cp regulates fatty acid oxidation genes through AMPK pathway, related to Figure 3.**

(A-B) *Creb3l3* (A) and *Cp* (B) mRNA levels in Cp-knockdown primary hepatocytes treated with JNK inhibitor (SP), PKA inhibitor (H89), SIRT1 inhibitor (Ex527) and AMPK inhibitor (CC). (C) Quantitative analysis of p-AMPK $\alpha$ /AMPK $\alpha$  and p-ACC1/ACC1 ratios in Figure 3C. (D) OCR in primary hepatocytes from CON and LKO mice and treated with CC for 24 h. (E) Immunoblot analysis of Cp and AMPK $\alpha$  in primary hepatocytes. The primary hepatocytes were isolated from AMPK $\alpha$ 1/ $\alpha$ 2 DKO (AMPK $\alpha$ -DKO) or AMPK $\alpha$ 1<sup>flox/flox</sup> and  $\alpha$ 2<sup>flox/flox</sup> (AMPK $\alpha$ <sup>f/f</sup>) mice, followed by the infection with Ad-shCp or Ad-shCon. Triangle indicates Cp. (F) Quantification of Oil Red O staining in Figure 3F.

Data shown in (A-B) are from one representative experiment of at least three independent experiments. Data are presented as mean  $\pm$  SEM. \*p<0.05, \*\*p<0.01, \*\*\*p<0.001 compared with the control group.

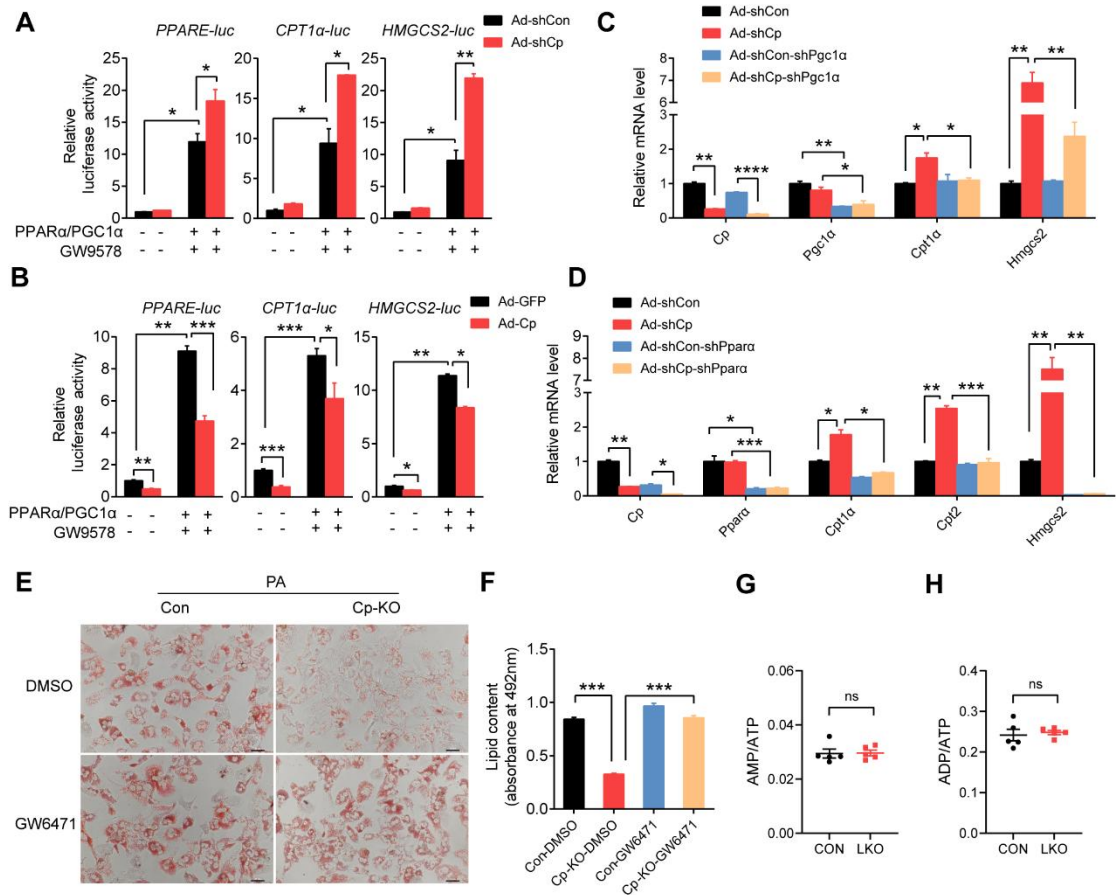

**Figure S4. Cp regulates fatty acid oxidation genes via the AMPK-PGC1 $\alpha$  axis, related to Figure 3.**

(A-B) Luciferase activity of reporters containing PPAR $\alpha$  response element (PPARE) (*PPARE-Luc*) and the promoter regions of *CPT1 $\alpha$*  (*CPT1 $\alpha$ -Luc*) and *HMGCS2* (*HMGCS2-Luc*) in Cp-knockdown (A) and Cp-overexpression (B) AML12 cells. (C-D) mRNA levels of FAO genes in Cp and Pgc1 $\alpha$  double-knockdown (C)



or Cp and Ppara double-knockdown (D) AML12 cells. (E-F) Representative images of Oil Red O staining (E) and their quantification (F) in primary hepatocytes from CON and LKO mice treated with a PPAR $\alpha$  inhibitor (GW6471), (scale bar: 50  $\mu$ m). (G-H) Analysis of AMP/ATP (G) and ADP/ATP (H) ratio in the livers of CON and LKO mice.

Data are presented as mean  $\pm$  SEM. \* $p$ <0.05, \*\* $p$ <0.01, \*\*\* $p$ <0.001 compared with the control group.

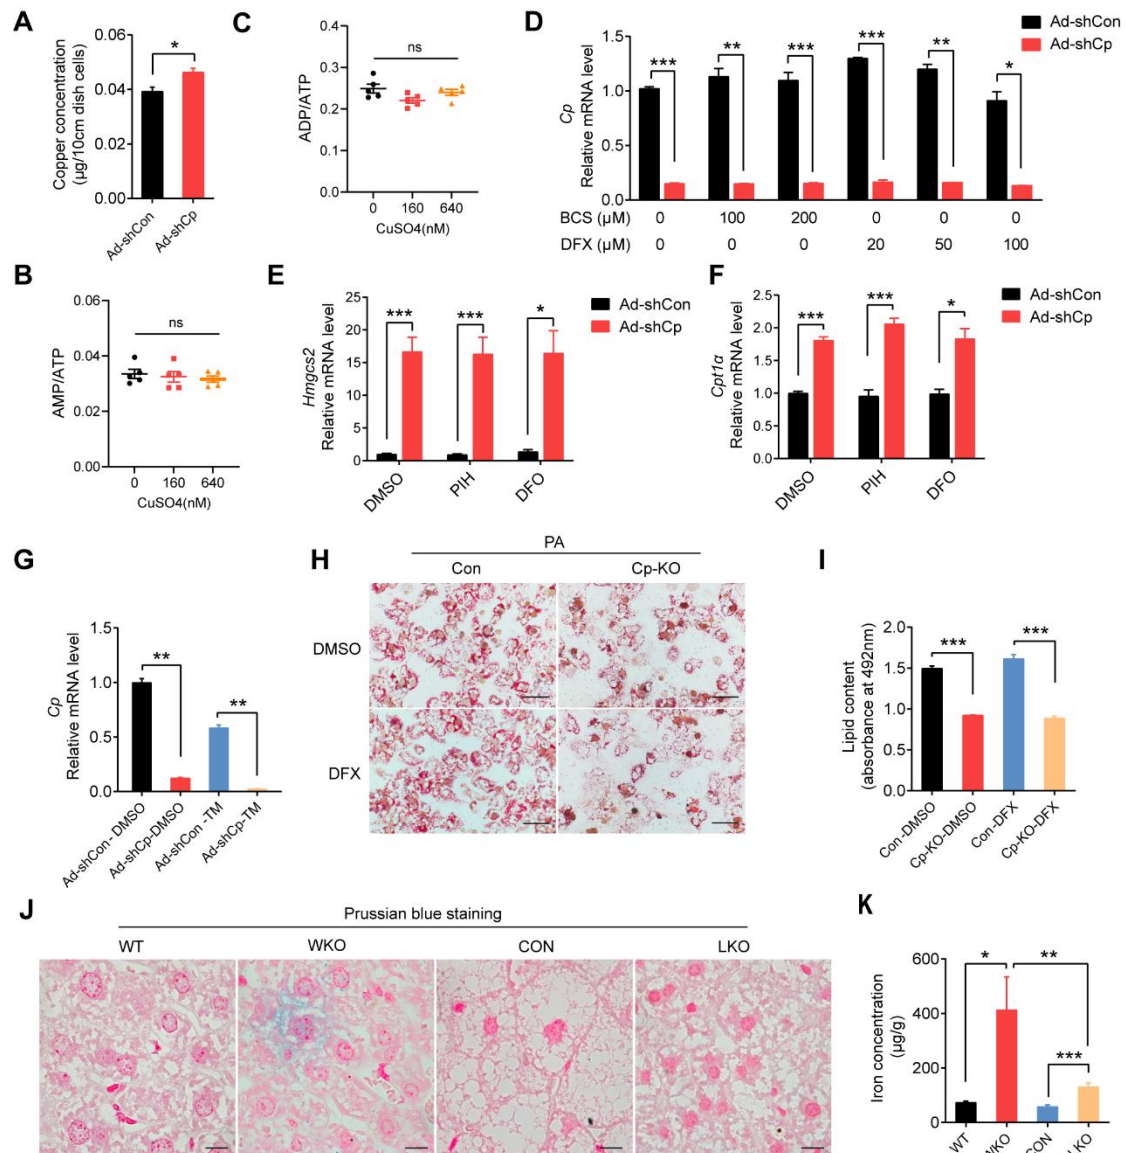

**Figure S5. Cp regulates AMPK signaling by changing intracellular copper concentrations, related to Figure 4.**

(A-G) Primary hepatocytes treated with Ad-shCp or Ad-shCon. (A) Cellular copper concentrations. (B-C) Analysis of AMP/ATP and ADP/ATP ratio in primary hepatocytes treated with CuSO<sub>4</sub> for 4h. (D) mRNA level of *Cp* in primary hepatocytes treated with a copper chelator (BCS) or an iron chelator (DFX). (E-F) mRNA levels of *Hmgcs2* (E) and *Cpt1α* (F) in primary hepatocytes treated with iron

chelators (PIH and DFO). (G) mRNA levels of *Cp* in primary hepatocytes treated with a copper chelator (TM). (H-I) Representative images of Oil Red O staining (H) and their quantification (I) of Con and *Cp*-KO primary hepatocytes treated with DFX and PA (scale bar: 50  $\mu$ m). (J-K) Prussian blue staining of iron (J) and ICP-MS detection of iron (K) in the livers from thirteen-month-old *Cp*-WKO mice and *Cp*-LKO mice fed five-month-HFD along with their control (scale bar: 10  $\mu$ m).

Data are presented as mean  $\pm$  SEM. \* $p$ <0.05, \*\* $p$ <0.01, \*\*\* $p$ <0.001 compared with the control group.

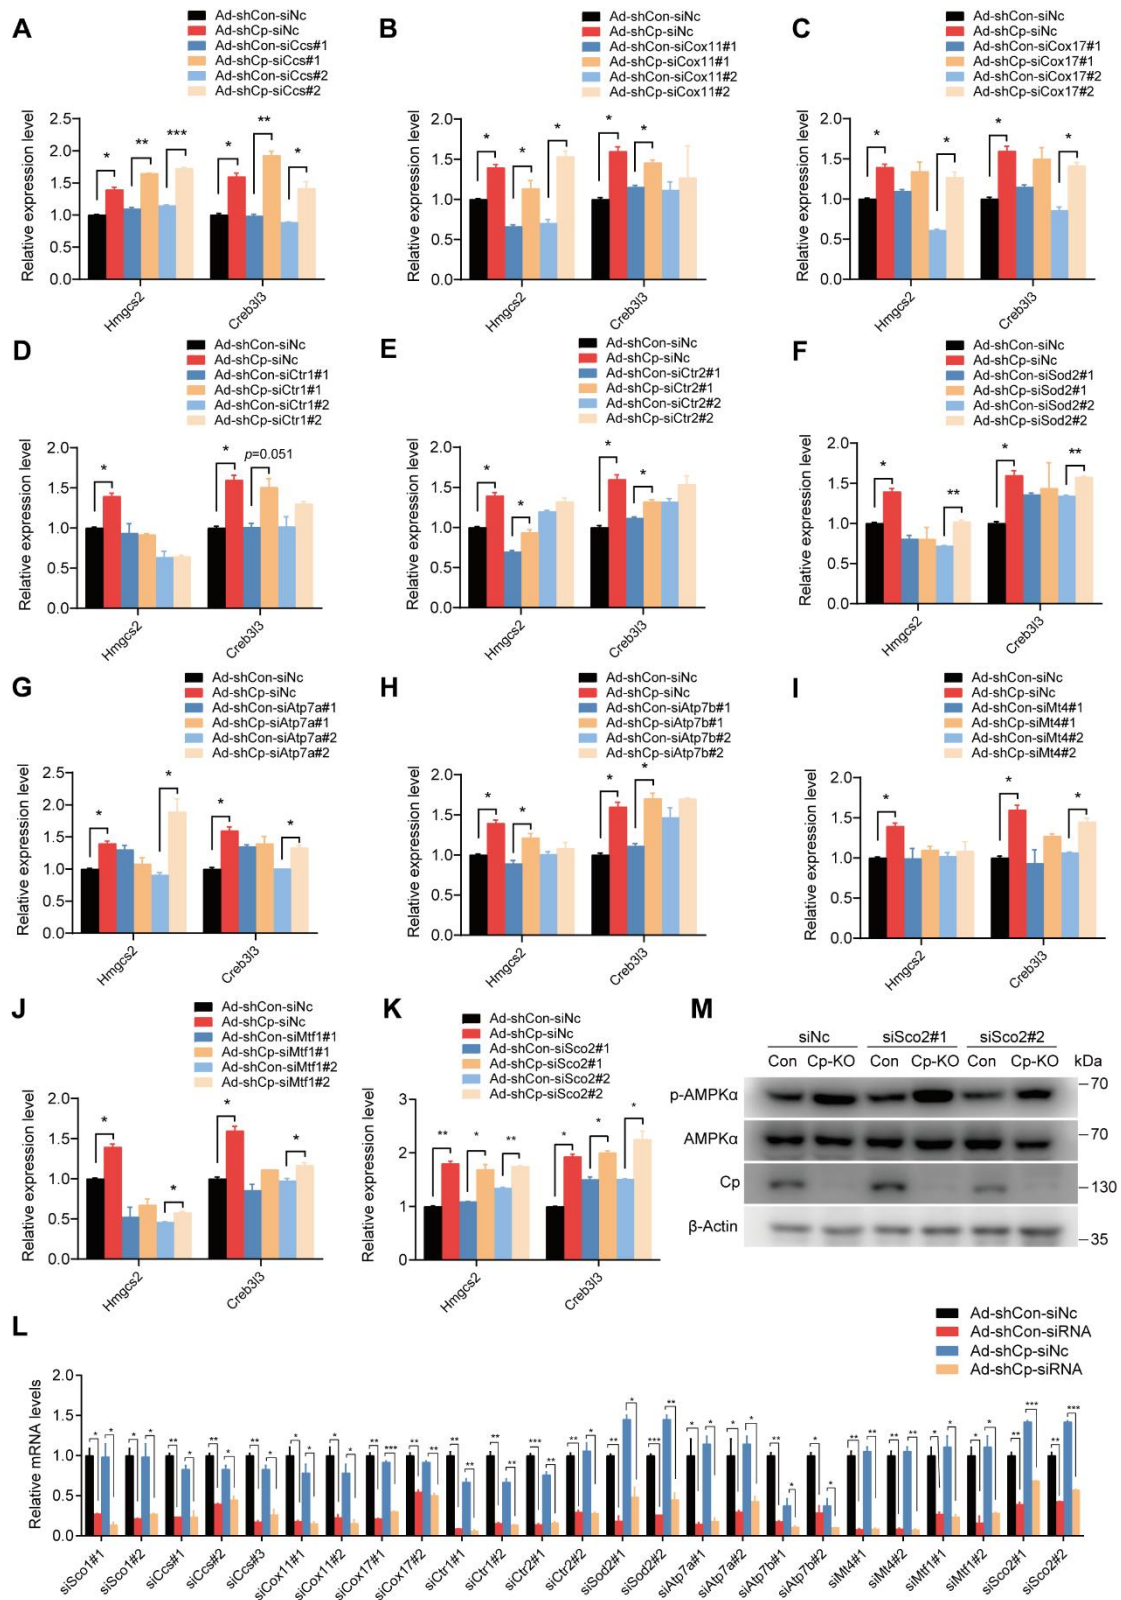

**Figure S6. Copper upregulates hepatic FAO via SCO1, related to Figure 4.**

(A-K) mRNA levels of *Hmgcs2* (A) and *Creb3l3* (B) in primary

hepatocytes isolated from Ad-shCp- and Ad-shCon-injected C57BL/6J mice and treated with indicated siRNAs. (L) mRNA levels of siRNAs targeted genes in (A-K). (M) Immunoblotting for p-AMPK $\alpha$ , AMPK and Cp in LKO primary hepatocytes (Cp-KO) treated with siRNA targeting Sco2 (siSco2#1, siSco2#2).

Data are presented as mean  $\pm$  SEM. \* $p < 0.05$ , \*\* $p < 0.01$ , \*\*\* $p < 0.001$  compared with the control group.

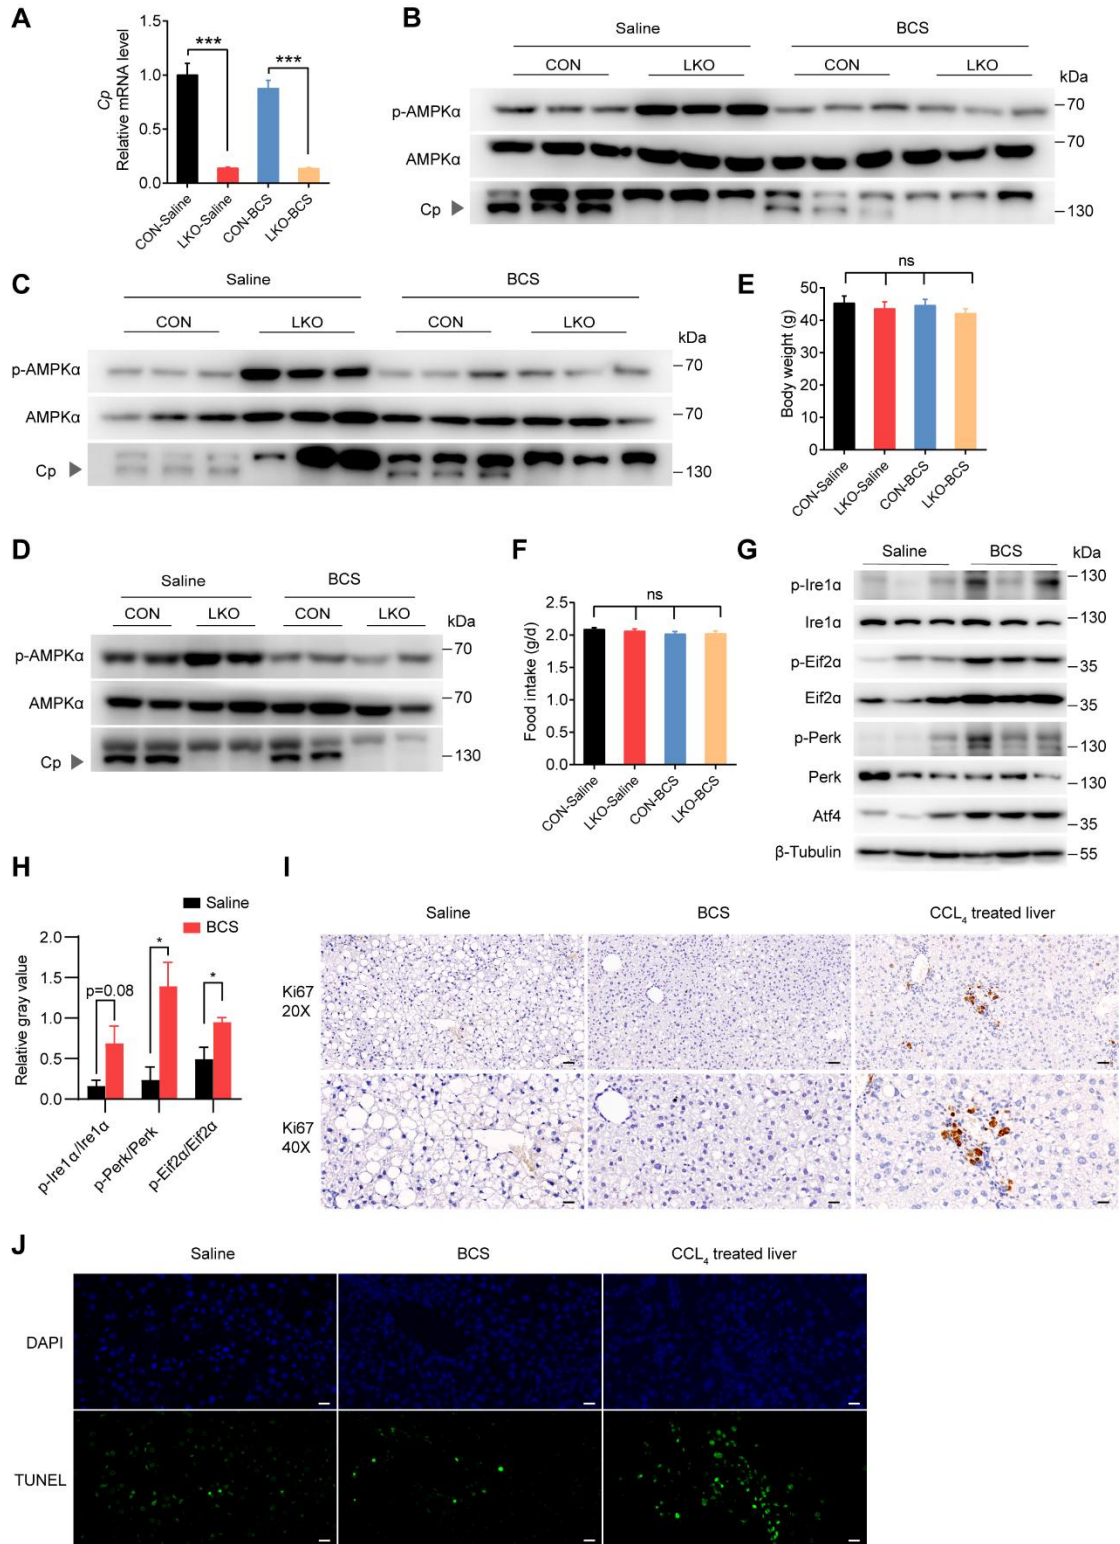

**Figure S7. Copper chelation aggravates hepatic steatosis, related to Figure 7.**

(A-J) LKO and control mice were treated as described in Figure 7A.

(A) mRNA level of *Cp* in mouse livers. (B-D) Immunoblots of p-AMPK $\alpha$ , AMPK $\alpha$  and *Cp* in mouse livers. Triangles indicate *Cp* band. (E) Body weight (g) of the mice. (F) Average daily food intake (g/d) of the mice. (G-H) Immunoblots of phosphorylated Irf1 $\alpha$ , Eif2 $\alpha$ , Perk and the level of Atf4 in the liver of control mice treated with BCS or Saline (G) and the quantitative analysis of p-Irf1 $\alpha$ /Irf1 $\alpha$ , p-Eif2 $\alpha$ /Eif2 $\alpha$ , p-Perk/Perk ratios (H). (I-J) The representative image of Ki67 (I) and TUNEL staining (J) in the liver of control mice treated with BCS or Saline, Ki67: 20X: scale bar, 50  $\mu$ m; 40X: scale bar, 20  $\mu$ m; TUNEL staining: scale bar, 20  $\mu$ m.

Data shown in (A) are from one representative experiment of at least three independent experiments. Data are presented as mean  $\pm$  SEM. \* $p$ <0.05, \*\* $p$ <0.01, \*\*\* $p$ <0.001 compared with the control group. ns, not significant.

**Table S1. Information of Human Samples, related to STAR Methods.**

| NO. | Gender | Age | Steatosis (%) |
|-----|--------|-----|---------------|
| 1   | M      | 55  | 0             |
| 2   | F      | 45  | 0             |
| 3   | F      | 32  | 0             |
| 4   | M      | 57  | 0             |
| 5   | F      | 36  | 0             |
| 6   | M      | 28  | 0             |
| 7   | M      | 29  | 0             |
| 8   | M      | 28  | 0             |
| 9   | M      | 41  | 0             |

|    |   |    |    |
|----|---|----|----|
| 10 | M | 36 | 0  |
| 11 | M | 47 | 0  |
| 12 | M | 34 | 0  |
| 13 | F | 53 | 0  |
| 14 | F | 47 | 0  |
| 15 | F | 29 | 5  |
| 16 | M | 35 | 5  |
| 17 | M | 57 | 5  |
| 18 | M | 31 | 5  |
| 19 | M | 32 | 5  |
| 20 | F | 45 | 5  |
| 21 | F | 40 | 5  |
| 22 | F | 55 | 5  |
| 23 | F | 55 | 10 |
| 24 | M | 39 | 10 |
| 25 | M | 43 | 10 |
| 26 | M | 29 | 10 |
| 27 | M | 45 | 10 |
| 28 | M | 40 | 10 |
| 29 | M | 39 | 15 |
| 30 | M | 58 | 15 |
| 31 | M | 56 | 15 |
| 32 | M | 34 | 15 |
| 33 | M | 29 | 15 |
| 34 | M | 28 | 15 |
| 35 | M | 35 | 15 |
| 36 | F | 33 | 20 |
| 37 | M | 31 | 20 |
| 38 | M | 45 | 30 |
| 39 | M | 35 | 30 |
| 40 | M | 54 | 30 |
| 41 | M | 53 | 35 |

**Table S2. Information of lipidomics, related to Figure 1.**

| NO. | ID            | fold change<br>(ShCp VS shCON) | P-value  |
|-----|---------------|--------------------------------|----------|
| 1   | DAG 14:0/18:2 | 0.203179                       | 0.00505  |
| 2   | DAG 16:0/16:0 | 0.335805                       | 0.014843 |
| 3   | DAG 16:0/18:0 | 0.651595                       | 0.016338 |
| 4   | DAG 16:0/18:1 | 0.148825                       | 0.009722 |
| 5   | DAG 16:0/18:2 | 0.142379                       | 0.010293 |
| 6   | DAG 16:0/20:4 | 0.178932                       | 0.006072 |



|    |                    |          |          |
|----|--------------------|----------|----------|
| 7  | DAG 16:0/22:5      | 0.181946 | 0.03114  |
| 8  | DAG 16:0/22:6      | 0.050415 | 0.044015 |
| 9  | DAG 16:1/16:0      | 0.131867 | 0.015356 |
| 10 | DAG 16:1/18:2      | 0.193039 | 0.001997 |
| 11 | DAG 17:1/18:1      | 0.24864  | 0.002951 |
| 12 | DAG 18:0/18:0      | 0.693817 | 0.019554 |
| 13 | DAG 18:0/18:1      | 0.401737 | 0.006887 |
| 14 | DAG 18:1/18:1      | 0.190529 | 0.010619 |
| 15 | DAG 18:1/18:2      | 0.273773 | 0.004599 |
| 16 | DAG 18:1/20:3      | 0.315891 | 0.013765 |
| 17 | DAG 18:1/22:6      | 0.21095  | 0.004348 |
| 18 | DAG 18:2/20:1      | 0.242298 | 0.005977 |
| 19 | FFA 12:0           | 0.431744 | 6.66E-06 |
| 20 | FFA 14:0           | 0.531987 | 1.45E-06 |
| 21 | FFA 14:1           | 0.400239 | 1.36E-07 |
| 22 | FFA 15:0           | 0.550607 | 3.62E-09 |
| 23 | FFA 16:0           | 0.712516 | 0.0019   |
| 24 | FFA 16:1           | 0.379435 | 2.07E-05 |
| 25 | FFA 17:0           | 0.815127 | 0.012047 |
| 26 | FFA 17:1           | 0.476851 | 7.37E-05 |
| 27 | FFA 18:0           | 0.882111 | 0.064643 |
| 28 | FFA 18:1           | 0.557908 | 0.000312 |
| 29 | FFA 18:2           | 0.681812 | 0.005801 |
| 30 | FFA 18:3           | 0.700244 | 0.016515 |
| 31 | FFA 19:0           | 0.887949 | 0.041527 |
| 32 | FFA 20:0           | 0.886782 | 0.112484 |
| 33 | FFA 20:1           | 0.514584 | 0.000109 |
| 34 | FFA 20:2           | 0.642481 | 0.002911 |
| 35 | FFA 20:4           | 0.675421 | 0.006337 |
| 36 | FFA 22:3           | 0.544562 | 0.002284 |
| 37 | FFA 22:4           | 0.575477 | 0.001089 |
| 38 | FFA 22:5           | 0.615834 | 0.001407 |
| 39 | FFA 22:6           | 0.451489 | 5.42E-05 |
| 40 | FFA 23:0           | 0.81223  | 0.008478 |
| 41 | TAG 10:0/16:0/18:1 | 0.175741 | 0.000377 |
| 42 | TAG 10:0/16:0/18:2 | 0.219829 | 0.000792 |
| 43 | TAG 12:0/16:1/18:2 | 0.210866 | 0.000157 |
| 44 | TAG 14:0/14:0/16:0 | 0.336743 | 0.000267 |
| 45 | TAG 14:0/16:0/16:0 | 0.322    | 0.000199 |
| 46 | TAG 14:0/16:0/16:1 | 0.204175 | 0.000129 |
| 47 | TAG 14:0/16:0/18:1 | 0.255234 | 8.68E-05 |
| 48 | TAG 14:0/16:1/16:1 | 0.17706  | 0.000412 |
| 49 | TAG 14:0/16:1/17:1 | 0.230074 | 9.47E-05 |

|    |                    |          |          |
|----|--------------------|----------|----------|
| 50 | TAG 14:0/16:1/18:2 | 0.172002 | 0.000301 |
| 51 | TAG 14:0/18:2/22:6 | 0.217273 | 0.000618 |
| 52 | TAG 15:0/16:0/16:1 | 0.330914 | 7.01E-05 |
| 53 | TAG 15:0/16:0/18:1 | 0.34106  | 3.08E-05 |
| 54 | TAG 16:0/16:0/16:0 | 0.373871 | 0.000246 |
| 55 | TAG 16:0/16:0/17:0 | 0.594759 | 0.004503 |
| 56 | TAG 16:0/16:0/18:0 | 0.438551 | 0.003694 |
| 57 | TAG 16:0/16:0/18:1 | 0.331956 | 9.92E-05 |
| 58 | TAG 16:0/17:0/18:0 | 0.54892  | 0.041553 |
| 59 | TAG 16:0/17:0/18:1 | 0.375125 | 8.03E-05 |
| 60 | TAG 16:0/17:1/18:1 | 0.313881 | 6.62E-05 |
| 61 | TAG 16:0/17:1/18:2 | 0.309259 | 0.000151 |
| 62 | TAG 16:0/18:0/18:0 | 0.519471 | 0.040591 |
| 63 | TAG 16:0/18:0/18:1 | 0.36072  | 0.000787 |
| 64 | TAG 16:0/18:1/18:1 | 0.442939 | 0.000415 |
| 65 | TAG 16:0/18:1/18:2 | 0.456923 | 0.000669 |
| 66 | TAG 16:0/18:1/19:0 | 0.365011 | 0.002655 |
| 67 | TAG 16:0/18:1/20:0 | 0.398746 | 0.02791  |
| 68 | TAG 16:0/18:1/20:1 | 0.339675 | 0.000675 |
| 69 | TAG 16:0/18:1/20:2 | 0.418473 | 0.000151 |
| 70 | TAG 16:0/18:1/20:3 | 0.444619 | 0.000462 |
| 71 | TAG 16:0/18:1/22:0 | 0.548186 | 0.121562 |
| 72 | TAG 16:0/18:1/22:1 | 0.390536 | 0.023651 |
| 73 | TAG 16:0/18:1/22:4 | 0.380091 | 0.000326 |
| 74 | TAG 16:0/18:1/22:5 | 0.356483 | 0.000431 |
| 75 | TAG 16:0/18:1/22:6 | 0.275288 | 9.82E-05 |
| 76 | TAG 16:0/18:2/18:2 | 0.387978 | 0.000553 |
| 77 | TAG 16:0/18:2/20:3 | 0.44159  | 0.001823 |
| 78 | TAG 16:0/18:2/20:4 | 0.284178 | 0.000135 |
| 79 | TAG 16:0/18:2/20:5 | 0.351232 | 0.008167 |
| 80 | TAG 16:0/18:2/22:6 | 0.288102 | 0.000574 |
| 81 | TAG 16:0/20:4/22:6 | 0.165419 | 9.01E-05 |
| 82 | TAG 16:0/20:5/22:6 | 0.155254 | 0.000158 |
| 83 | TAG 16:0/22:4/22:5 | 0.424561 | 0.000745 |
| 84 | TAG 16:0/22:4/22:6 | 0.216182 | 6.05E-05 |
| 85 | TAG 16:0/22:6/22:6 | 0.136051 | 0.000285 |
| 86 | TAG 16:1/16:0/16:1 | 0.208135 | 0.000139 |
| 87 | TAG 16:1/16:0/17:1 | 0.270558 | 5.76E-05 |
| 88 | TAG 16:1/16:0/18:1 | 0.301881 | 0.00015  |
| 89 | TAG 16:1/16:0/18:2 | 0.244964 | 0.000129 |
| 90 | TAG 16:1/16:1/17:1 | 0.225473 | 0.00014  |
| 91 | TAG 16:1/16:1/18:2 | 0.221624 | 0.000397 |
| 92 | TAG 16:1/16:1/18:3 | 0.238949 | 0.001181 |

|     |                    |          |          |
|-----|--------------------|----------|----------|
| 93  | TAG 16:1/17:1/18:2 | 0.287303 | 0.000332 |
| 94  | TAG 16:1/18:2/18:2 | 0.266578 | 0.00051  |
| 95  | TAG 16:1/18:2/22:6 | 0.232136 | 0.000624 |
| 96  | TAG 17:0/18:1/18:1 | 0.333675 | 0.000285 |
| 97  | TAG 17:0/18:1/18:2 | 0.361684 | 0.000238 |
| 98  | TAG 17:0/18:1/20:4 | 0.371808 | 3.64E-05 |
| 99  | TAG 17:1/18:1/18:2 | 0.367938 | 0.000568 |
| 100 | TAG 17:1/18:1/22:4 | 0.395809 | 0.001597 |
| 101 | TAG 18:1/18:1/19:0 | 0.33393  | 0.001306 |
| 102 | TAG 18:1/18:1/19:1 | 0.328988 | 0.000263 |
| 103 | TAG 18:1/18:1/20:1 | 0.348914 | 0.0009   |
| 104 | TAG 18:1/18:1/22:4 | 0.374304 | 0.000148 |
| 105 | TAG 18:1/18:1/22:6 | 0.358374 | 0.000154 |
| 106 | TAG 18:1/18:2/19:1 | 0.411503 | 0.000353 |
| 107 | TAG 18:1/18:2/20:1 | 0.439837 | 0.000583 |
| 108 | TAG 18:1/18:2/22:4 | 0.402705 | 0.000331 |
| 109 | TAG 18:1/20:1/20:1 | 0.448971 | 0.032627 |
| 110 | TAG 18:1/20:1/20:2 | 0.471922 | 0.017026 |
| 111 | TAG 18:1/20:1/20:3 | 0.422835 | 0.001225 |
| 112 | TAG 18:1/20:1/22:4 | 0.395572 | 0.000937 |
| 113 | TAG 18:1/20:1/22:5 | 0.433163 | 0.007402 |
| 114 | TAG 18:1/20:3/22:4 | 0.400049 | 0.000917 |
| 115 | TAG 18:2/18:1/22:6 | 0.364218 | 0.000671 |
| 116 | TAG 42:1           | 0.27355  | 0.00166  |
| 117 | TAG 55:1           | 0.448081 | 0.036021 |
| 118 | TAG 57:2           | 0.449781 | 0.026737 |
| 119 | TAG 57:3           | 0.377408 | 0.00597  |
| 120 | TAG 60:5           | 0.5577   | 0.04277  |

**Table S4. The siRNA sequences, related to Figure 1, Figure 4, Figure 5 and Figure S6.**

| NO. | Genes    | siRNA oligo         |
|-----|----------|---------------------|
| 1   | Cox11 #1 | TCAAGGACCGGGTCATTAA |
| 2   | Cox11 #2 | GAACTTCAGACCTCAGCAA |
| 3   | Cox17 #1 | GCGTGATGCGTGCATCATT |
| 4   | Cox17 #2 | GCGTGCATCATTGAGAAAG |
| 5   | Ctrl #1  | CCACACGGACGACAACATT |
| 6   | Ctrl #2  | CCAAATGGAACCATCCTAA |
| 7   | Ctrl #1  | CCGTGCTTCTCTTTGATTT |
| 8   | Ctrl #2  | CCAGATCAACTTCAGACAA |
| 9   | Sod2 #1  | GCCAAGGGAGATGTTACAA |

|    |            |                           |
|----|------------|---------------------------|
| 10 | Sod2 #2    | GCTCTAATCAGGACCCATT       |
| 11 | Atp7a #1   | GCTCTTCTCCACAATGCTA       |
| 12 | Atp7a #2   | GCAGCCGAAGTACCTCAA        |
| 13 | Atp7b #1   | CCTTAAGGCTGGGACCAAT       |
| 14 | Atp7b #2   | CCCATCACTTGGACCACAA       |
| 15 | Mt4 #1     | GCGGAGATAATTGCAAATG       |
| 16 | Mt4 #2     | TCTGCATCTGCGGAGATAA       |
| 17 | Mtf1 #1    | GCAGACAGCTGCCTTGATT       |
| 18 | Mtf1 #2    | CCAACTCTGTCCTAACTAA       |
| 19 | Sco1 #1    | CCTGTTTCTTGGAAGTCTT       |
| 20 | Sco1 #2    | GCAGCATTGGGAAGCCTTT       |
| 21 | Ccs #1     | CCTTCCGGATAGAGGATAA       |
| 22 | Ccs #2     | GCCATCCCTTATCCAAGAT       |
| 23 | Ccs #3     | CCTTACGAGGGACTGCAAT       |
| 24 | Nfkb1      | GCAGGCCACCAACTACAAT       |
| 25 | Atox1      | TCTCCAGAGTCCTCAACAA       |
| 26 | Pfkb       | GCAATGTAGCCGTCATCAA       |
| 27 | Creb3l3 #1 | GGACATGTGGAGCACAGAT       |
| 28 | Creb3l3 #2 | GCTGCCTCTCACCAAGTAT       |
| 29 | Gys1       | GCACCTGGACTTCAACCTA       |
| 30 | Vcam1      | GCTGTGACCTGTCTGCAA        |
| 31 | Hk2        | GCTGCTGTTCCAAGGGAAA       |
| 32 | Akr1d1     | GCACATTGATGGCGCCTAT       |
| 33 | Cyp7a1     | GCACATAAAGCCCGGGAAA       |
| 34 | Acsbg1     | GGGTGTGATGCTGAGTCAA       |
| 35 | Aldh1l2    | GCAGAGATGGTGGTGGATT       |
| 36 | Slc10a1    | GCTCCAATATCCTGGCCTA       |
| 37 | Bbox1      | CCATCTGGAAGGAGCGTAT       |
| 38 | Cp         | CGGAACAGTCCAATTTCTATCTTCA |
| 39 | Sco2 #1    | CAGCCUACUAGACCACAAATT     |
| 40 | Sco2 #2    | GCAGAUCGUAGAGAGUAUATT     |
| 41 | Lkb1 #1    | GATTGCCAATGGACTGGACACCTTT |
| 42 | Lkb1 #2    | CAGTTTGCCCAAGGCTGTTTGTGTG |
